# Supplementary material for: Functional T Cell Reactivity to Melanocyte Antigens Is Lost during the Progression of Malignant Melanoma, but Is Restored by Immunization
Source: MDPI journal article supplement (doi:10.3390/cancers13020223), 2021-01-09
Supplement: s1 [file s1]

Supplementary Table 2. Characteristics of untreated melanoma patients (MP) tested in this study.

| Donor no | Gender | Age (at diagnosis) | Stage (at diagnosis) | Localization of primary lesion | Melanoma treatment*   | Melanoma proggresion** |
|----------|--------|--------------------|----------------------|--------------------------------|-----------------------|------------------------|
| 1        | Female | 51                 | IV                   | torso                          | surgery, radiotherapy | yes                    |
| 2        | Male   | 60                 | IV                   | torso                          | surgery               | no                     |
| 3        | Male   | 57                 | IV                   | torso                          | surgery, radiotherapy | yes                    |
| 4        | Female | 63                 | IV                   | unknown                        | surgery               | yes                    |
| 5        | Male   | 64                 | IV                   | head                           | surgery               | no                     |
| 6        | Male   | 64                 | IV                   | limb                           | surgery               | no                     |
| 7        | Male   | 35                 | IV                   | limb                           | surgery               | yes                    |
| 8        | Male   | 61                 | IV                   | torso                          | surgery               | no                     |
| 9        | Male   | 73                 | IV                   | torso                          | surgery               | no                     |
| 10       | Female | 45                 | IV                   | torso                          | surgery, radiotherapy | no                     |
| 11       | Male   | 65                 | IV                   | limb                           | surgery               | yes                    |
| 12       | Male   | 42                 | IV                   | torso                          | surgery               | no                     |
| 13       | Male   | 53                 | IV                   | torso                          | surgery               | yes                    |
| 14       | Male   | 79                 | IV                   | limb                           | surgery               | no                     |
| 15       | Female | 48                 | IV                   | limb                           | surgery               | no                     |
| 16       | Male   | 68                 | IV                   | torso                          | surgery               | yes                    |
| 17       | Female | 60                 | IV                   | torso                          | surgery               | no                     |
| 18       | Female | 63                 | IV                   | torso                          | surgery, radiotherapy | yes                    |
| 19       | Female | 57                 | IV                   | head                           | surgery               | no                     |
| 20       | Female | 47                 | IV                   | limb                           | surgery               | yes                    |
| 21       | Male   | 34                 | IV                   | torso                          | surgery               | no                     |
| 22       | Female | 70                 | IV                   | limb                           | surgery               | no                     |
| 23       | Female | 70                 | IV                   | limb                           | surgery               | no                     |
| 24       | Female | 54                 | IV                   | torso                          | surgery               | yes                    |

\* treatment performed before the blood collection ; no earlier immunotherapy

\*\* melanoma proggresion at the time of blood collection
