# Supplementary material for: Functional T Cell Reactivity to Melanocyte Antigens Is Lost during the Progression of Malignant Melanoma, but Is Restored by Immunization
Source: MDPI journal article supplement (doi:10.3390/cancers13020223), 2021-01-09
Supplement: s1 [file s1]

Supplementary Table 3. Characteristics of melanoma patients treated with AGI-101H (VMP) tested in this study.

| Donor no | Gender | Age (at diagnosis) | Stage (at diagnosis) | Localization of primary lesion | Initial resection (primary lesion and metastasis) | Time of vaccine adm. (month) | Tumor-free period (month) * | Recurrence of melanoma | Other melanoma treatment during vaccination | Co-existing tumor           |
|----------|--------|--------------------|----------------------|--------------------------------|---------------------------------------------------|------------------------------|-----------------------------|------------------------|---------------------------------------------|-----------------------------|
| 1        | Male   | 52                 | III                  | torso                          | yes                                               | 120                          | 120                         | no                     | no                                          | no                          |
| 2        | Male   | 31                 | II                   | torso                          | yes                                               | 132                          | 132                         | no                     | no                                          | no                          |
| 3        | Female | 48                 | III                  | torso                          | yes                                               | 132                          | 132                         | no                     | no                                          | no                          |
| 4        | Male   | 46                 | III                  | limb                           | yes                                               | 156                          | 156                         | no                     | no                                          | no                          |
| 5        | Female | 38                 | III                  | limb                           | yes                                               | 204                          | 204                         | no                     | no                                          | no                          |
| 6        | Male   | 27                 | III                  | limb                           | yes                                               | 180                          | 180                         | no                     | no                                          | no                          |
| 7        | Female | 51                 | III                  | limb                           | yes                                               | 120                          | 72                          | yes                    | no **                                       | no                          |
| 8        | Male   | 26                 | III                  | head                           | yes                                               | 120                          | 120                         | no                     | no                                          | no                          |
| 9        | Male   | 42                 | II                   | torso                          | yes                                               | 168                          | 168                         | no                     | no                                          | no                          |
| 10       | Female | 33                 | IV                   | limb                           | yes                                               | 180                          | 180                         | no                     | no                                          | no                          |
| 11       | Male   | 50                 | III                  | torso                          | yes                                               | 156                          | 156                         | no                     | no                                          | no                          |
| 12       | Male   | 60                 | III                  | limb                           | yes                                               | 168                          | 168                         | no                     | no                                          | no                          |
| 13       | Female | 50                 | III                  | limb                           | yes                                               | 180                          | 180                         | no                     | no                                          | no                          |
| 14       | Male   | 30                 | III                  | limb                           | yes                                               | 132                          | 132                         | no                     | no                                          | no                          |
| 15       | Female | 26                 | III                  | limb                           | yes                                               | 192                          | 192                         | no                     | no                                          | no                          |
| 16       | Male   | 70                 | IV                   | limb                           | yes                                               | 156                          | 156                         | no                     | no                                          | squamous cell carcinoma *** |
| 17       | Male   | 60                 | III                  | unknown                        | yes                                               | 144                          | 144                         | no                     | no                                          | no                          |
| 18       | Female | 56                 | III                  | unknown                        | yes                                               | 144                          | 144                         | no                     | no                                          | no                          |
| 19       | Male   | 62                 | III                  | head                           | yes                                               | 144                          | 144                         | no                     | no                                          | no                          |
| 20       | Female | 41                 | III                  | limb                           | yes                                               | 144                          | 144                         | no                     | no                                          | no                          |
| 21       | Female | 34                 | III                  | torso                          | yes                                               | 168                          | 168                         | no                     | no                                          | no                          |
| 22       | Male   | 49                 | IV                   | torso                          | yes                                               | 132                          | 132                         | no                     | no                                          | no                          |
| 23       | Female | 25                 | III                  | unknown                        | yes                                               | 156                          | 156                         | no                     | no                                          | no                          |
| 24       | Female | 35                 | III                  | torso                          | yes                                               | 60                           | 60                          | no                     | no                                          | no                          |
| 25       | Female | 58                 | III                  | torso                          | yes                                               | 48                           | 48                          | no                     | no                                          | no                          |
| 26       | Male   | 78                 | III                  | head                           | yes                                               | 60                           | 60                          | no                     | no                                          | no                          |
| 27       | Female | 50                 | II                   | unknown                        | yes                                               | 57                           | 57                          | no                     | no                                          | no                          |

\* disease-free survival (DSF) was defined as the time between the last diagnosed and resected tumor (metastasis) and the blood sampling (PBMC isolation)

\*\* only reinduction phase was repeated; vaccination with AGI-101H 8 times every 2 weeks

\*\*\* diagnosed in 5 month after blood sampling; not melanoma metastasis.

All patients were stable at the time of blood sampling
