# Supplementary material for: Functional T Cell Reactivity to Melanocyte Antigens Is Lost during the Progression of Malignant Melanoma, but Is Restored by Immunization
Source: MDPI journal article supplement (doi:10.3390/cancers13020223), 2021-01-09
Supplement: s1 [file s1]

Supplementary Table 1. Characteristics of healthy donors (HD) tested in this study.

| Donor no | Age | Gender | HLA Class I        |                    |                    | Donor no | Age | Gender | HLA Class I        |                    |                     |
|----------|-----|--------|--------------------|--------------------|--------------------|----------|-----|--------|--------------------|--------------------|---------------------|
|          |     |        | HLA - A            | HLA - B            | HLA - C            |          |     |        | HLA - A            | HLA - B            | HLA - C             |
| 1        | 35  | Male   | A*29:02<br>A*68:01 | B*40:08<br>B*44:03 | C*03:04<br>C*16:01 | 21       | 39  | Female | A*03:01<br>A*31:01 | B*07:02<br>B*27:05 | C*02:02<br>C*07:02  |
| 2        | 38  | Male   | A*30:02<br>A*33:03 | B*18:01<br>B*53:01 | C*04:01<br>C*07:01 | 22       | 34  | Male   | A*02:06<br>A*03:01 | B*35:01<br>B*45:01 | C*04:01<br>C*06:02  |
| 3        | 24  | Male   | A*24:02<br>A*31:01 | B*40:02<br>B*51:01 | C*03:04<br>C*15:09 | 23       | 33  | Female | A*01:01<br>A*29:02 | B*13:02<br>B*51:01 | C*02:02<br>C*06:02  |
| 4        | 49  | Female | A*01:01<br>A*01:01 | B*14:02<br>B*41:02 | C*07:01<br>C*17:03 | 24       | 53  | Male   | A*29:02<br>A*30:01 | B*42:01<br>B*49:01 | C*07:01<br>C*17:01  |
| 5        | 27  | Female | A*01:01<br>A*68:02 | B*08:01<br>B*53:01 | C*06:02<br>C*07:01 | 25       | 39  | Male   | A*02:01<br>A*03:01 | B*57:04<br>B*58:02 | C*06:02P<br>C*18:02 |
| 6        | 30  | Male   | A*02:01<br>A*25:01 | B*35:01<br>B*44:03 | C*04:01<br>C*16:01 | 26       | 19  | Female | A*01:01<br>A*03:01 | B*08:01<br>B*35:01 | C*04:01<br>C*07:01  |
| 7        | 41  | Male   | A*02:01<br>A*23:01 | B*15:01<br>B*44:03 | C*04:01<br>C*04:01 | 27       | 36  | Male   | not tested         | not tested         | not tested          |
| 8        | 28  | Male   | A*02:01<br>A*29:02 | B*40:01<br>B*44:03 | C*03:04<br>C*16:01 | 28       | 22  | Female | A*02:01<br>A*03:01 | B*35:01<br>B*45:01 | C*06:02<br>C*16:01  |
| 9        | 41  | Male   | A*02:01<br>A*29:02 | B*08:01<br>B*40:01 | C*03:04<br>C*07:01 | 29       | 24  | Female | A*03:01<br>A*66:01 | B*35:01<br>B*39:01 | C*04:01<br>C*04:04  |
| 10       | 30  | Male   | A*03:01<br>A*24:02 | B*15:10<br>B*35:01 | C*03:04<br>C*04:01 | 30       | 48  | Male   | A*24:02<br>A*31:01 | B*15:01<br>B*18:01 | C*03:03<br>C*07:01  |
| 11       | 34  | Male   | A*02:01<br>A*24:02 | B*35:01<br>B*40:02 | C*03:04<br>C*04:01 | 31       | 29  | Female | A*11:01<br>A*68:01 | B*27:05<br>B*39:02 | C*01:02<br>C*07:02  |
| 12       | 37  | Male   | not tested         | not tested         | not tested         | 32       | 28  | Male   | A*01:01<br>A*02:01 | B*57:01<br>B*57:01 | C*06:02<br>C*06:02  |
| 13       | 51  | Female | A*33:01<br>A*68:01 | B*14:02<br>B*48:01 | C*08:01<br>C*08:02 | 33       | 40  | Male   | not tested         | not tested         | not tested          |
| 14       | 25  | Female | A*01:01<br>A*30:02 | B*08:01<br>B*27:05 | C*02:02<br>C*07:01 | 34       | 30  | Male   | A*02:01<br>A*24:02 | B*39:05<br>B*51:01 | C*02:02<br>C*07:02  |
| 15       | 42  | Male   | A*11:01<br>A*30:02 | B*35:01<br>B*44:02 | C*04:01<br>C*05:01 | 35       | 38  | Male   | A*02<br>A*30       | B*07<br>B*35       | not tested          |
| 16       | 40  | Male   | A*01:01<br>A*29:02 | B*08:01<br>B*49:01 | C*07:01<br>C*07:01 | 36       | 48  | Male   | A*03:01<br>A*68:02 | B*07:02<br>B*14:02 | C*07:02<br>C*08:02  |
| 17       | 26  | Male   | A*02:01<br>A*24:07 | B*15:13<br>B*35:05 | C*04:01<br>C*08:01 | 37       | 51  | Male   | A*01:01<br>A*32:01 | B*07:02<br>B*14:02 | C*07:02<br>C*08:02  |
| 18       | 41  | Male   | A*11:01<br>A*29:02 | B*51:01<br>B*51:01 | C*03:03<br>C*16:01 | 38       | 51  | Male   | A*02:01<br>A*02:01 | B*40:01<br>B*49:01 | C*03:04<br>C*07:01  |
| 19       | 26  | Female | not tested         | not tested         | not tested         | 39       | 40  | Male   | A*01:01<br>A*29:02 | B*44:03<br>B*57:01 | C*06:02<br>C*16:01  |
| 20       | 69  | Male   | A*01:01<br>A*01:01 | B*08:01<br>B*13:02 | C*07:01<br>C*07:01 | 40       | 21  | Female | A*24:02<br>A*30:01 | B*15:03<br>B*40:02 | C*02:10<br>C*03:04  |
